# Supplementary material for: Association of Dual LRRK2 G2019S and GBA Variations With Parkinson Disease Progression
Source: PubMed Central journal article supplement (PMC8060834; doi:10.1001/jamanetworkopen.2021.5845), 2021-04-21
Supplement: jamanetwopen-e215845-s001.pdf [file jamanetwopen-e215845-s001.pdf]

## Supplemental Online Content

Ortega RA, Wang C, Raymond D, et al. Association of dual *LRRK2* G2019S and *GBA* variation with Parkinson disease progression. *JAMA Netw Open*. 2021;4(4):e215845. doi:10.1001/jamanetworkopen.2021.5845

**eTable.** Interaction Between *LRRK2* and *GBA* for Rate of MoCA Decline

**eFigure.** Interaction Between *LRRK2* and *GBA* for Rate of MoCA Decline

This supplemental material has been provided by the authors to give readers additional information about their work.

**eTable.** Interaction Between *LRRK2* and *GBA* for Rate of MoCA Decline

|                                                                                                                                                                                                                                                                                                                                                                                      | Estimate: B ± SE <sup>1</sup>                                                                         |
|--------------------------------------------------------------------------------------------------------------------------------------------------------------------------------------------------------------------------------------------------------------------------------------------------------------------------------------------------------------------------------------|-------------------------------------------------------------------------------------------------------|
| <p>Interaction effect between <i>LRRK2</i> and <i>GBA</i> mutations on the rate of cognitive progression*:</p> <p><u>B</u> minus <u>A</u>**:</p> <p><u>Difference in presence of <i>LRRK2</i> - difference in absence of <i>LRRK2</i></u></p> <p>** As well as <u>D</u> minus <u>C</u>:</p> <p><u>Difference in presence of <i>GBA</i> – difference in absence of <i>GBA</i></u></p> | <p>0.22 ± 0.11 points/year<br/>p=0.044</p>                                                            |
| <p>Effect of <i>GBA</i> mutations on non-<i>LRRK2</i>-G2019S carriers:</p> <p>Decline among <i>GBA</i>-PD</p> <p>Decline among idiopathic PD</p> <p><u>A</u>: Difference in absence of <i>LRRK2</i>-G2019S:<br/><i>GBA</i>-PD minus idiopathic PD</p>                                                                                                                                | <p>-0.52 ± 0.09 points/year<br/>-0.29 ± 0.05 points/year<br/>-0.23 ± 0.08 points/year<br/>p=0.005</p> |
| <p>Effect of <i>GBA</i> mutations on <i>LRRK2</i>-G2019S carriers:</p> <p>Decline among <i>LRRK2</i>/<i>GBA</i>-PD</p> <p>Decline among <i>LRRK2</i>-PD</p> <p><u>B</u>: Difference in presence of <i>LRRK2</i>-G2019S:<br/><i>LRRK2</i>/<i>GBA</i>-PD minus <i>LRRK2</i>-PD</p>                                                                                                     | <p>-0.21 ± 0.06 points/year<br/>-0.19 ± 0.06 points/year<br/>0.01 ± 0.07 points/year<br/>p=0.845</p>  |
| <p>Effect of <i>LRRK2</i> mutations on non-<i>GBA</i> carriers</p> <p>Decline among <i>LRRK2</i>-PD</p> <p>Decline among idiopathic PD</p> <p><u>C</u>: Difference in absence of <i>GBA</i>:</p>                                                                                                                                                                                     | <p>-0.21 ± 0.06 points/year<br/>-0.29 ± 0.05 points/year<br/>0.10 ± 0.06 points/year</p>              |

|                                                          |                          |
|----------------------------------------------------------|--------------------------|
| <i>LRRK2</i> -PD minus idiopathic PD                     | p=0.080                  |
| Effect of <i>LRRK2</i> mutations on <i>GBA</i> carriers: |                          |
| Decline among <i>LRRK2/GBA</i> -PD                       | -0.21 ± 0.06 points/year |
| Decline among <i>GBA</i> -PD                             | -0.52 ± 0.09 points/year |
| <u>D</u> : Difference in presence of <i>GBA</i> -PD:     | 0.31 ± 0.092 points/year |
| <i>LRRK2/GBA</i> -PD minus <i>GBA</i> -PD                | p<0.001                  |

<sup>1</sup> This table demonstrates the requisite estimates involved in deriving the interaction effect between *LRRK2* and *GBA* mutations on the rate of cognitive progression. The interaction effect can be estimated by subtracting the effect of harboring a *GBA* mutation on rate of cognitive decline among non-*LRRK2*-G2019S mutation carriers (e.g. slopes in *GBA*-PD minus idiopathic PD) from the effect of harboring a *GBA* mutation on the rate of cognitive decline among *LRRK2*-G2019S mutation carriers (e.g. slopes in *LRRK2/GBA*-PD minus *LRRK2*-PD). Similarly, it could be estimated by subtracting the effect of harboring a *LRRK2* mutation on rate of cognitive decline among non-*GBA* mutation carriers (e.g. slopes in *LRRK2*-PD minus idiopathic PD) from the effect of harboring a *LRRK2* mutation on the rate of cognitive decline among *GBA* mutation carriers (e.g. slopes in *LRRK2/GBA*-PD minus *GBA*-PD).

**eFigure.** Interaction Between *LRRK2* and *GBA* for Rate of MoCA Decline

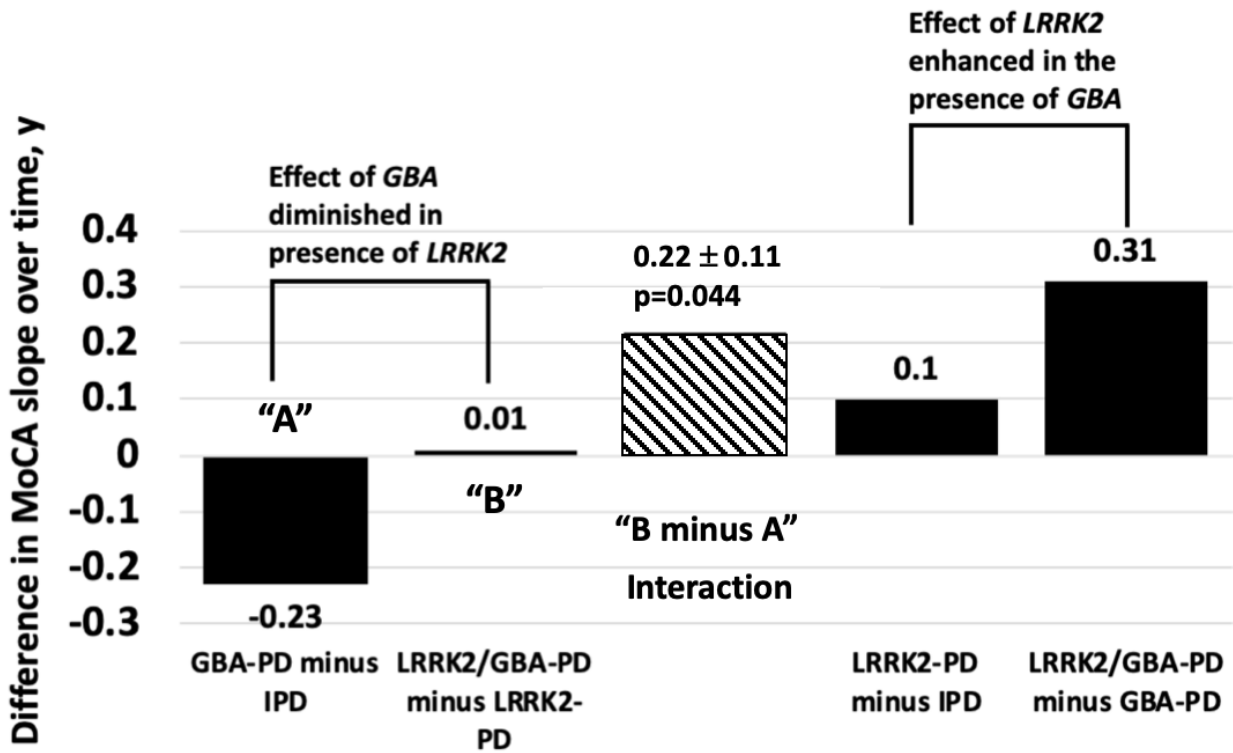

eFigure 1. The interaction effect can be estimated by subtracting the effect of harboring a *GBA* mutation on rate of cognitive decline among non-*LRRK2* mutation carriers (e.g. slopes in *GBA*-PD minus idiopathic PD) from the effect of harboring a *GBA* mutation on the rate of cognitive decline among *LRRK2* mutation carriers (e.g. slopes in *LRRK2/GBA*-PD minus *LRRK2*-PD). Similarly, it could be estimated by subtracting the effect of harboring a *LRRK2* mutation on rate of cognitive decline among non-*GBA* mutation carriers (e.g. slopes in *LRRK2*-PD minus idiopathic PD) from the effect of harboring a *LRRK2* mutation on the rate of cognitive decline among *GBA* mutation carriers (e.g. slopes in *LRRK2/GBA*-PD minus *GBA*-PD). See also Supplemental table 1.
